Leslie C. Jameson, M.D., and Richard P. Dutton, M.D., M.B.A., CME Editors

## Instructions for Obtaining Continuing Medical Education (CME) Credit

ANESTHESIOLOGY's Journal CME is open to all readers. Members of the American Society of Anesthesiologists (ASA) enjoy a preferred rate for their subscription. However, Journal CME is not limited to ASA members or Journal subscribers. To take part in Journal CME, complete the following steps:

1. For the articles listed below, read the learning objectives and disclosure information.
2. Read the articles in the print or online edition.
3. Register at [www.asahq.org/journal-cme](http://www.asahq.org/journal-cme) and provide payment.
4. Once online, complete the questions and other required information for the CME program, including the evaluation.

The American Society of Anesthesiologists is accredited by the Accreditation Council for Continuing Medical Education to provide continuing medical education for physicians.

The American Society of Anesthesiologists designates this educational activity for a maximum of 1 *AMA PRA Category 1 Credit(s)*<sup>TM</sup>. Physicians should only claim credit commensurate with the extent of their participation in the activity.

**Purpose:** The focus of ANESTHESIOLOGY Journal CME is to educate readers on current developments in the science and clinical practice of anesthesiology.

**Target Audience:** ANESTHESIOLOGY Journal CME is designed for physicians involved with anesthesiology education, clinical practice, and research.

### Journal CME Planning Participants Disclosures

**Editor-in-Chief:** James C. Eisenach, M.D., receives research funding from King Pharmaceuticals.

**CME Editors:** Leslie C. Jameson, M.D., has no relevant financial relationships to disclose. Richard P. Dutton, M.D., M.B.A., returned a disclosure form indicating receiving funded research and consulting fees from Novo Nordisk, funded research and consulting fees from Octa Pharma, and funded research from CSL Behring.

**ASA Staff:** Employees involved in planning have no relevant financial relationships to disclose.

### Claiming Credit

All tests and requests for credit must be submitted through the ANESTHESIOLOGY CME website at [www.asahq.org/journal-cme](http://www.asahq.org/journal-cme). Participants should claim credit in 15-minute increments, for a maximum of 1 *AMA PRA Category 1 Credit(s)*<sup>TM</sup> per journal article.

Two payment options are available:

|            | ASA Member | Non-member |
|------------|------------|------------|
| Annual Fee | \$60       | \$120      |
| Per Issue  | \$10       | \$20       |

Payment may be made using Visa or MasterCard.

Please direct any questions about Journal CME to:  
Joyce Canselor  
Education Coordinator, CME  
(847) 268-9185  
[j.canselor@asahq.org](mailto:j.canselor@asahq.org)

### This Month's ANESTHESIOLOGY Journal CME

Read the article by Bijker *et al.* entitled "Intraoperative hypotension and 1-year mortality after noncardiac surgery" on page 1217 and the accompanying editorial by Kheterpal *et al.* entitled "Too much of a good thing is wonderful: Observational data for perioperative research" on page 1183 of this issue.

### Learning Objective(s)

After completing this exercise, the learner will know the value and limitations of anesthesia information management systems, the risk factors associated with death within 1 yr of noncardiac surgery, and the association between intraoperative hypotension and mortality.

### Author(s) Disclosures

**Authors:** Jilles B. Bijker, M.D., Wilton A. van Klei, M.D., Ph.D., Yvonne Vergouwe, Ph.D., Douglas J. Eleveld, Ph.D., Leo van Wolfswinkel, M.D., Ph.D., Karel G. M. Moons, Ph.D., and Cor J. Kalkman, M.D., Ph.D., returned disclosure forms indicating that they have no financial interest in or affiliation with any commercial supporter or providers of any commercial services discussed in this educational material.

**Authors:** Kevin K. Tremper, Ph.D., M.D., returned a disclosure form indicating that he received royalties and other material support from GE. Sachin Kheterpal, M.D., M.B.A., and Derek T. Woodrum, M.D., returned disclosure forms indicating that they have no financial interest in or affiliation with any commercial supporter or providers of any commercial services discussed in this educational material.

### Expiration

Registration and submission of answers must be completed by December 31, 2012.
